# Supplementary material
Source: publisher figshare collection journal article supplement (https://tandf.figshare.com/articles/dataset/_/3443969)
Supplement: Supplementary file 1 [file 2]

**Supplemental Online Material 2:** List of the endemic taxa of Cyprus (alphabetically for families) for which there is some indication of trade via the Internet and number of nurseries involved: I, corresponds to nurseries providing detailed information on the specific taxon; II, to nurseries that stopped trading the specific taxon (in parenthesis the year they stopped); III, to nurseries not providing any detailed information. Given are also the IUCN extinction risk categories at national (Tsintides et al. 2007), European (Bilz et al. 2011) and global level (Walter & Gillett 1998) for the assessed taxa (CR=Critically Endangered, EN=Endangered, VU=Vulnerable, NT=Near Threatened, R=Rare, DD=Data Deficient, I=Indeterminate). Marked with ‘#’ are the taxa covered by the CITES Convention, with ‘*’ are the taxa included in Annexes of EU DIR 92/43/EEC, and with ‘^’ are the taxa covered by the Bern Convention.

| **Family and taxon** | **Bilz  et al. (2011)** | **Tsintides et al. (2007)** | **Walter & Gillett (1998)** | **Number of involved nurseries1** | | | |
| --- | --- | --- | --- | --- | --- | --- | --- |
|  |  |  |  | **I. Current**  **trade** | **II. Past trade (year)** | **III. Without detailed info** | **Total** |
| **Amaryllidaceae** |  |  |  |  |  |  |  |
| *Allium cupani* Raf. subsp. *cyprium* Meikle |  |  |  |  |  | 1 | 1 |
| **Araceae** |  |  |  |  |  |  |  |
| *Arum sintenisii* (Engl.) P.C.Boyce |  | VU |  | 2 | 1 (2009) | 1 | 4 |
| **Araliaceae** |  |  |  |  |  |  |  |
| *Hedera cypria* (McAll.) Hand |  |  |  | 2 |  | 3 | 5 |
| **Asparagaceae** |  |  |  |  |  |  |  |
| *Ornithogalum chionophilum* Holmboe |  |  |  | 1 |  | 1 | 2 |
| **^Scilla lochiae* (Meikle) Speta | DD | VU | EN | 1 | 2 (2011) |  | 3 |
| **Scilla morrisii* Meikle | CR | EN | EN |  | 1 (2011) | 1 | 2 |
| **Asteraceae** |  |  |  |  |  |  |  |
| *Centaurea calcitrapa* L. subsp. *angusticeps* (H. Lindb.) Meikle |  |  |  | 1 |  |  | 1 |
| *Onopordum cyprium* Eig |  |  |  | 1 |  |  | 1 |
| **Boraginaceae** |  |  |  |  |  |  |  |
| *Onosma fruticosa* Sm. |  |  |  | 1 |  |  | 1 |
| **Brassicaceae** |  |  |  |  |  |  |  |
| *Arabis cypria* Holmboe |  |  |  |  | 1 (2009) | 2 | 3 |
| *Arabis purpurea* Sm. |  |  |  | 2 |  | 1 | 3 |
| *Biscutella didyma* L. subsp. *dunensis* Chrtek & B. Slavik |  |  |  |  |  | 1 | 1 |
| *^*Brassica hilarionis* Post | EN | EN | VU |  |  | 1 | 1 |
| **Campanulaceae** |  |  |  |  |  |  |  |
| *Campanula veneris* Carlstrom |  |  |  |  |  | 1 | 1 |
| **Caprifoliaceae** |  |  |  |  |  |  |  |
| *Pterocephalus multiflorus* Poech. subsp. *multiflorus* |  |  |  | 1 |  |  | 1 |
| *Scabiosa cyprica* Post |  |  | VU |  |  | 1 | 1 |
| **Caryophyllaceae** |  |  |  |  |  |  |  |
| *Dianthus cyprius* A.K. Jacks. & Turrill |  |  | VU |  |  | 1 | 1 |
| *Saponaria cypria* Boiss. |  |  | VU | 2 |  |  | 2 |
| **Cistaceae** |  |  |  |  |  |  |  |
| *Helianthemum obtusifolium* Dunal |  |  |  |  |  | 1 | 1 |
| **Crassulaceae** |  |  |  |  |  |  |  |
| *Sedum cyprium* A.K. Jacks. & Turrill |  |  | R | 1 |  |  | 1 |
| *Sedum microstachyum* (Kotschy) Boiss. |  | VU |  | 1 |  | 1 | 2 |
| **Euphorbiaceae** |  |  |  |  |  |  |  |
| *Euphorbia veneris* M.S. Khan |  |  | R | 1 |  |  | 1 |
| **Fabaceae** |  |  |  |  |  |  |  |
| *Trifolium angustifolium* L. subsp. *pamphylicum* (Boiss. & Heldr.) Ponert |  |  |  | 1 |  |  | 1 |
| *^*Astragalus macrocarpus* C. Agerer-Kirchhoff & Meikle subsp. *lefkarensis* Meikle & Kirchhoff | CR | VU | EN |  |  | 1 | 1 |
| *Hedysarum cyprium* Boiss. |  | VU |  |  |  | 1 | 1 |
| **Fagaceae** |  |  |  |  |  |  |  |
| *Quercus alnifolia* Poech |  |  |  | 2 |  | 1 | 3 |
| **Hypericaceae** |  |  |  |  |  |  |  |
| *Hypericum repens* Duby ex Nyman |  |  |  |  |  | 1 | 1 |
| **Iridaceae** |  |  |  |  |  |  |  |
| *^*Crocus cyprius* Boiss. & Kotschy | VU | VU | EN | 1 | 1 (2011) |  | 2 |
| *^*Crocus hartmannianus* Holmboe | VU | VU | EN |  | 1 (2009) |  | 1 |
| *Crocus veneris* Tapp. ex Poech |  |  |  |  | 1 (2011) | 1 | 2 |
| *Gladiolus triphyllus* (Sm.) Ker Gawl. |  |  |  | 1 |  |  | 1 |
| **Lamiaceae** |  |  |  |  |  |  |  |
| *Nepeta italica* L. subsp. *troodi* (Holmboe) A.L. Budantsev |  |  | R |  |  | 1 | 1 |
| *^Origanum cordifolium* (Montbret & Aucher ex Benth.) Vogel | VU | VU | VU |  | 1 (2001) |  | 1 |
| *^*Phlomis cypria* Post | DD | VU | R |  | 2 (2003) | 1 | 3 |
| *Salvia willeana* (Holmboe) Hedge |  |  | R | 1 |  |  | 1 |
| *Scutellaria cypria* Rech. f. subsp. *cypria* |  |  |  |  | 1 (2011) |  | 1 |
| *^*Sideritis cypria* Post | VU | EN | R | 1 |  |  | 1 |
| *Teucrium cyprium* Boiss. |  |  |  | 1 |  |  | 1 |
| *Teucrium divaricatum* Sieber ex Heldr. subsp. *canescens* (Celak.) Holmboe |  |  |  | 1 |  |  | 1 |
| *Teucrium micropodioides* Rouy |  |  |  |  | 2 (2006) |  | 2 |
| *Thymus integer* Griseb. |  |  |  |  | 1 (2006) |  | 1 |
| **Liliaceae** |  |  |  |  |  |  |  |
| **^Tulipa cypria* Stapf ex Turrill | EN | EN | EN |  | 1 (2011) |  | 1 |
| **Orchidaceae** |  |  |  |  |  |  |  |
| #*,*,^Ophrys kotschyi* H. Fleischm. & Soo subsp. *kotschyi* | NT | VU | VU | 1 |  |  | 1 |
| **Pinaceae** |  |  |  |  |  |  |  |
| *Cedrus brevifolia* (Hook. f.) Elwes & A. Henry |  | VU |  |  |  | 1 | 1 |
| **Poaceae** |  |  |  |  |  |  |  |
| *Arrhenatherum album* (Vahl) Clayton subsp. *cypricola* H. Scholz |  |  | I |  |  | 1 | 1 |
| **Primulaceae** |  |  |  |  |  |  |  |
| #*Cyclamen cyprium* Kotschy |  |  |  | 5 |  | 1 | 6 |
| **Rubiaceae** |  |  |  |  |  |  |  |
| *Asperula cypria* Ehrend. |  |  |  |  |  | 1 | 1 |
| **Urticaceae** |  |  |  |  |  |  |  |
| *Urtica dioica* L. subsp. *cyrpia* H. Lindb |  |  |  | 1 |  |  | 1 |

1These nurseries are: (1) [http://b-and-t-world-seeds.com](http://b-and-t-world-seeds.com/) (France), (2) [http://www.rareplants.es](http://www.rareplants.es/) (Spain, previously in Germany <http://www.rareplants.de/shop>), (3) <http://myorchids.de/main1.htm> (Germany), (4) [http://www.plantdelights.com](http://www.plantdelights.com/) (U.S.A.), (5) [http://www.anniesannuals.com](http://www.anniesannuals.com/) (U.S.A.), (6) [http://www.hillkeep.ca](http://www.hillkeep.ca/) (Canada), (7) [http://rarebulbs.lv](http://rarebulbs.lv/) (Latvia), (8) [http://www.plant-world-seeds.com](http://www.plant-world-seeds.com/) (U.K.), (9) [http://www.beechesnursery.co.uk](http://www.beechesnursery.co.uk/) (U.K.), (10) [http://www.cgf.net](http://www.cgf.net/) (U.K.), (11) <https://www.evolution-plants.com/uk> (U.K.), (12) [http://www.rareplants.co.uk](http://www.rareplants.co.uk/) (U.K.), (13) [http://www.choicelandscapes.org](http://www.choicelandscapes.org/) (U.K.), (14) [http://www.broadleigh-bulbs-spring.co.uk](http://www.broadleigh-bulbs-spring.co.uk/) (U.K.), (15) [http://www.bluebellnursery.com](http://www.bluebellnursery.com/) (U.K.), (16) [http://www.fibrex.co.uk](http://www.fibrex.co.uk/) (U.K.), (17) [http://www.rvroger.co.uk](http://www.rvroger.co.uk/) (U.K.), (18) <http://www.chris-pattison.co.uk/> (U.K.), (19) <http://www.dulford-nurseries.co.uk/> (U.K.), (20) <http://www.westonbirtplants.co.uk/> (U.K.), (21) http://www.florianabulbose.com/ (Italy)
